# Supplementary material
Source: PubMed Central journal article supplement (PMC2529371)

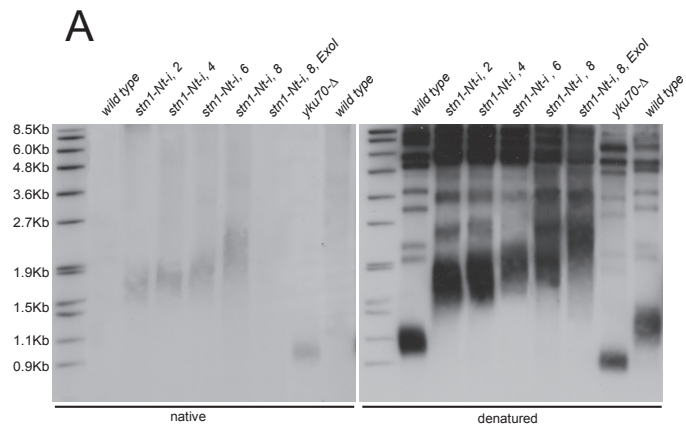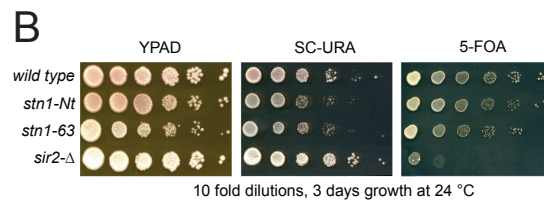

Puglisi et al., Figure S2

Supplement: emboj2008158s2.pdf [file emboj2008158s2.pdf]

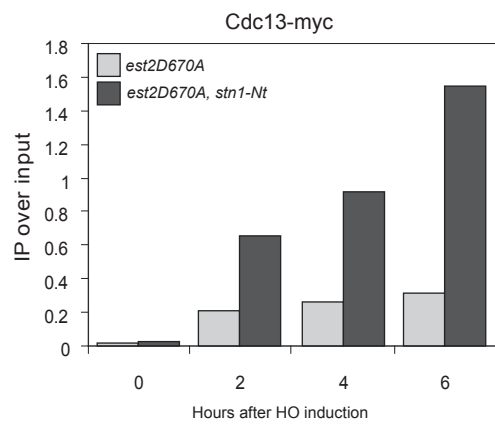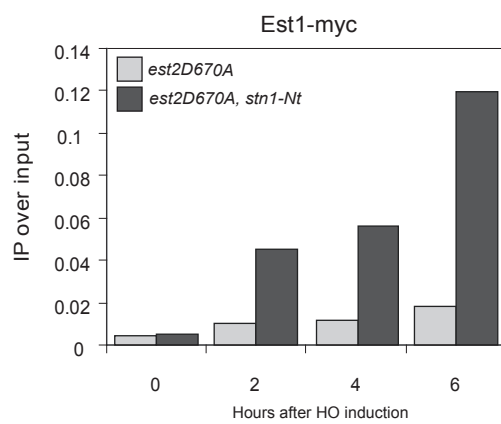

Puglisi et al, Figure S3

Supplement: emboj2008158s3.pdf [file emboj2008158s3.pdf]

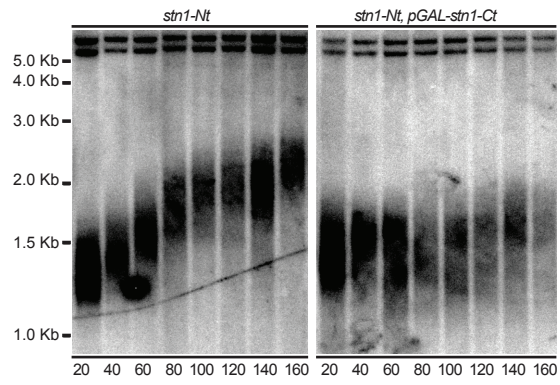

Puglisi et al., Figure S4

Supplement: emboj2008158s4.pdf [file emboj2008158s4.pdf]

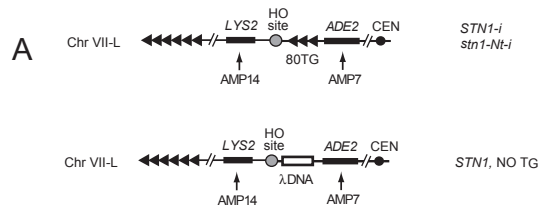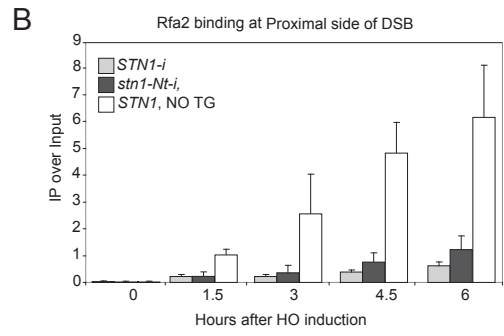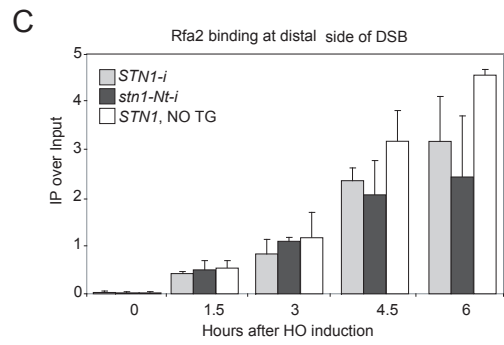

Supplement: emboj2008158s5.pdf [file emboj2008158s5.pdf]

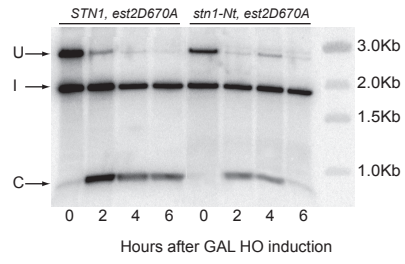

Puglisi et al., Figure S6

Supplement: emboj2008158s6.pdf [file emboj2008158s6.pdf]

**A**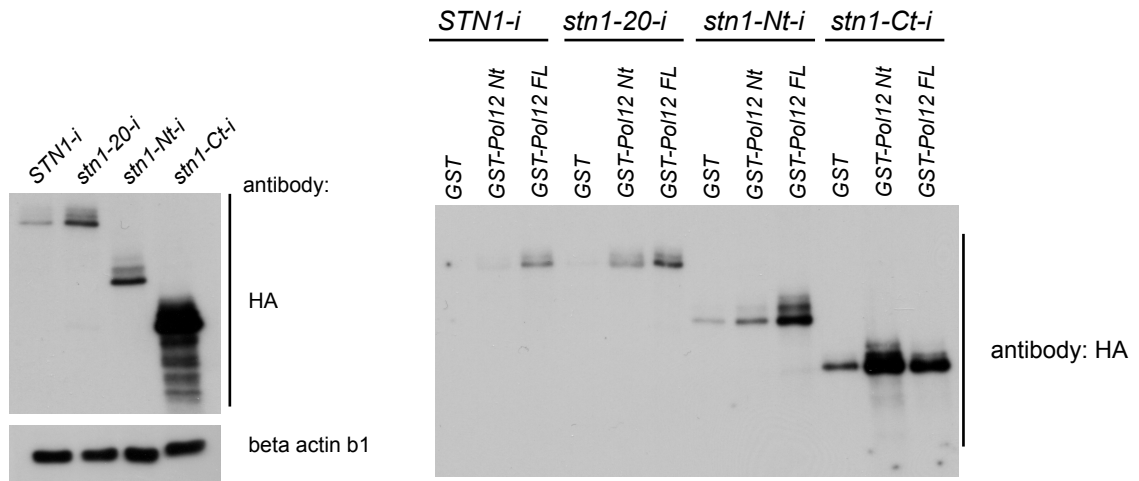**B**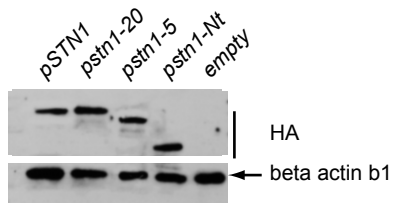

Supplement: emboj2008158s7.pdf [file emboj2008158s7.pdf]
